# Supplementary material for: Synthesis, characterization, and photocatalytic degradation of Rhodamine B dye under sunlight irradiation of porous titanosilicate (TS)/bismuth vanadate (BiVO4) nanocomposite hybrid catalyst
Source: Royal Society of Chemistry journal article supplement (doi:10.1039/c7nj00071e), 2017-01-01
Supplement: c7nj00071e1.pdf [file c7nj00071e1.pdf]

# Synthesis, characterization and photocatalytic degradation of Rhodamine B dye under Sun light irradiation of Porous Titanosilicate (TS)/Bismuth vanadate (BiVO<sub>4</sub>) nanocomposite hybrid catalyst

A. Ajay kumar, Katta Vamsi , Narayanan Venkatathri\*

Department of Chemistry, National Institute of Technology, Warangal 506 004, Telangana, India

(\*corresponding author, Mobile : 9491319976 and E-mail : [venkatathrin@yahoo.com](mailto:venkatathrin@yahoo.com))

## Photoluminescence

To further confirm the separation mechanism of electron–hole pairs in BVTS1 hybrid nanocomposite as discussed above, the room temperature PL properties of the as-prepared pure m-BiVO<sub>4</sub> and BVTS1 hybrid nanocomposite were investigated as shown in Fig. S1. The PL spectra of pure m-BiVO<sub>4</sub> and BVTS1 hybrid nanocomposite were obtained under an excitation wavelength of 325 nm. As shown in Fig. S1, an emission at about 546 nm was obviously detected in both pure BiVO<sub>4</sub> and m- BVTS1 hybrid nanocomposite. However, the fluorescence intensity of BVTS1 hybrid nanocomposite (red line) was weaker than that of pure BiVO<sub>4</sub> (black line), clearly demonstrating that the recombination of photogenerated electron–hole pairs was inhibited greatly in BVTS1 hybrid nanocomposite. This result is good agreement with the analysis by the energy band position of BiVO<sub>4</sub> and TS, as discussed above. Thus, the PL spectra offer direct evidence for the efficient separation of photogenerated electron–hole pairs in BVTS1 hybrid nanocomposite, leading to enhanced photocatalytic degradation of RhB, compared to pure BiVO<sub>4</sub> and pure TS.

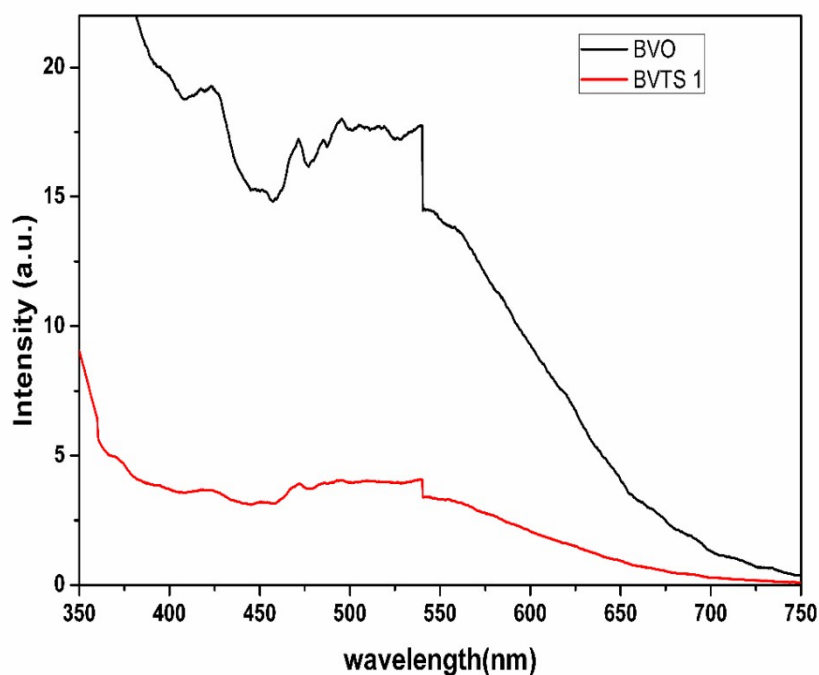

Fig. S1: Photoluminescence of pure BiVO<sub>4</sub> (BVO) and BVTS 1 Hybrid nanocomposite.

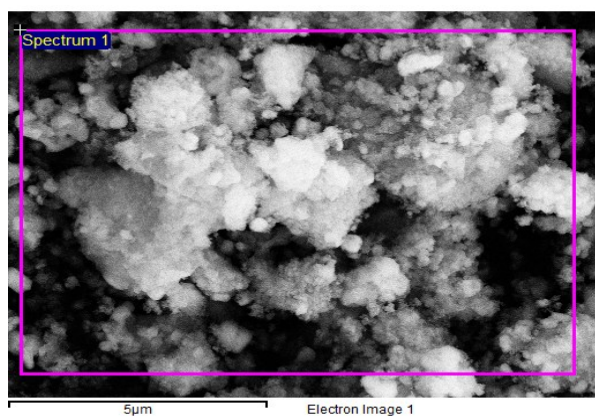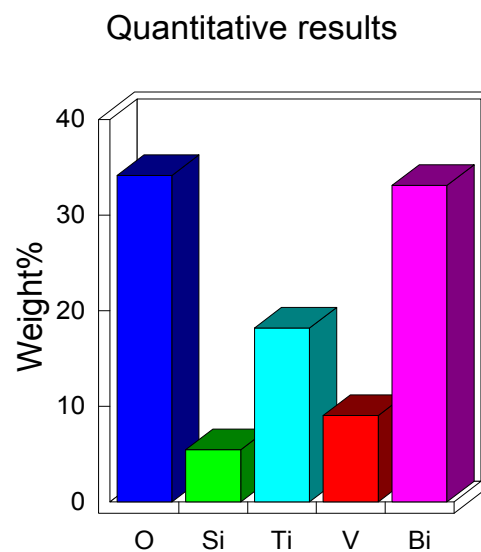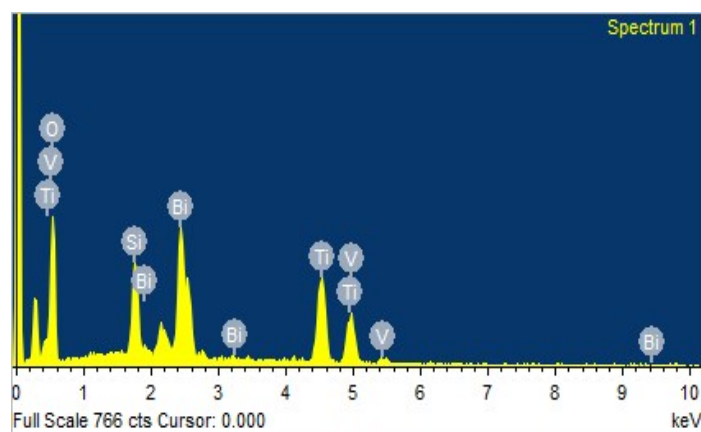

| Element | Weight% | Atomic% |
|---------|---------|---------|
| O K     | 34.17   | 70.11   |
| Si K    | 5.45    | 6.37    |
| Ti K    | 18.21   | 12.48   |
| V K     | 9.06    | 5.84    |
| Bi M    | 33.11   | 5.20    |
| Totals  | 100.00  |         |

Fig. S2: FESEM EDX of elemental composition BVTS 1 Hybrid nanocomposite
